# Supplementary material
Source: Springer Nature journal article supplement (https://www.springermedizin.de/resource/supplementary/13023_2013_710_MOESM3_ESM.pdf/9642902)

**A**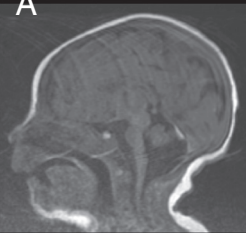**B**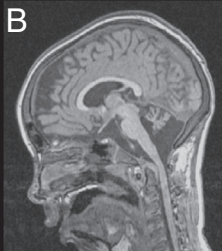**C**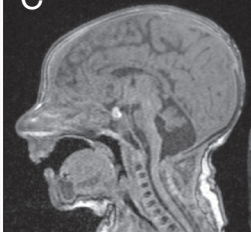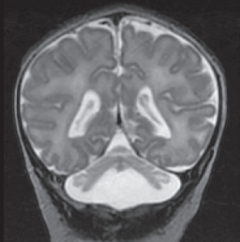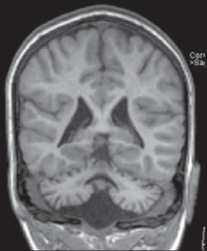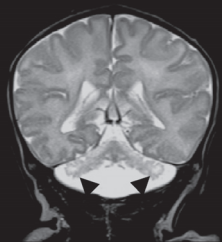

Supplement: MOESM3 [file 9642902]
